# Supplementary material for: Hsp70 Interacts with the TREM-1 Receptor Expressed on Monocytes and Thereby Stimulates Generation of Cytotoxic Lymphocytes Active against MHC-Negative Tumor Cells
Source: MDPI journal article supplement (doi:10.3390/ijms22136889), 2021-06-26
Supplement: s1 [file s1]

Institution: IBG

Protocol: 3P Tanya lymph 240120.PRO

Listmode Replay: New Protocol

Analysis Date: 20-Apr-2021, 20:04:34

Settings File: 3P Tanya lymph 240120.PRO, 28-Jan-2020, 15:34:51

Listmode File: 4 day Hsp70 1d CD3 CD4 CD8 00012761 2020-01-28 605.LMD

Run Date: 28-Jan-20, 15:35:08

Sample ID: 4 day Hsp70 1d

User ID: Yashin

Acquisition Time/Events: 9.3s / 10000 (PROTOCOL)

Instrument SN: AK02006 Software Version: CXP 2.2

4 day Hsp70 1d CD3 CD4 CD8 00012761 2020-01-28 60(F1)[A] 4 day Hsp70 1d CD3 CD4 CD8 00012761 2020-01-28 605.LMD : FL1 Log/FL

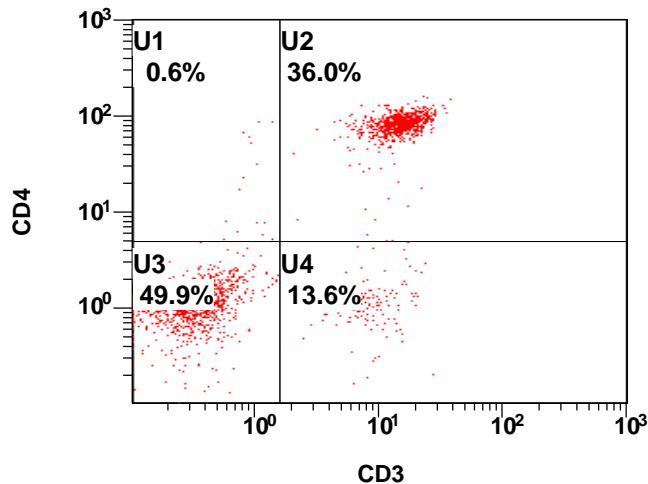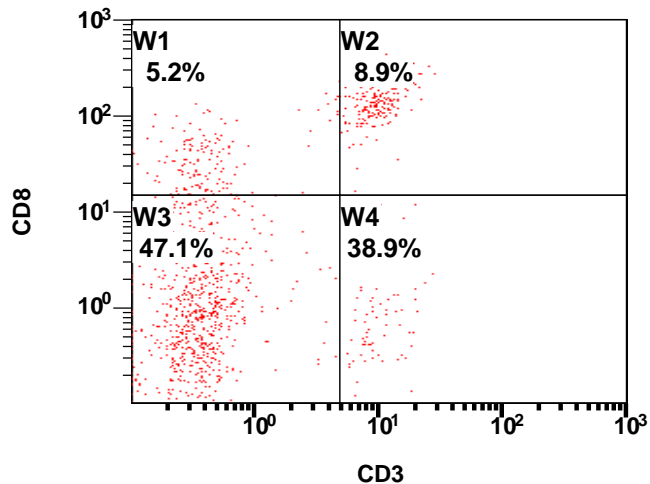

4 day Hsp70 1d CD3 CD4 CD8 00012761 2020-01-28 6(F1)[Ungated] 4 day Hsp70 1d CD3 CD4 CD8 00012761 2020-01-28 605.LMD : SS Lin

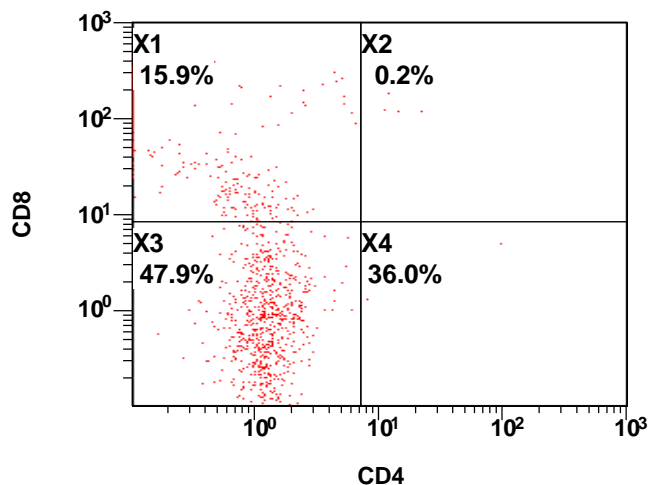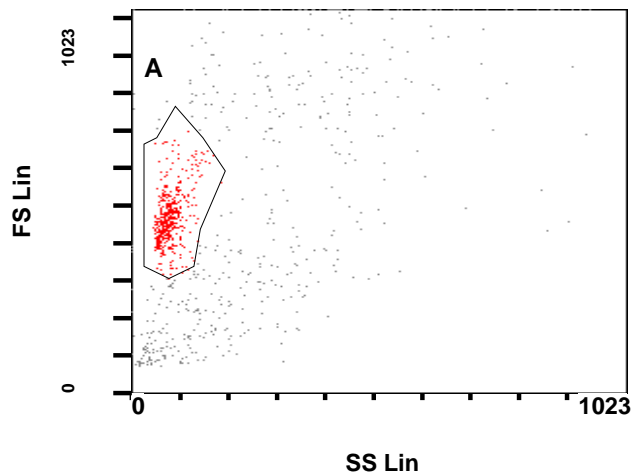

1)[A] 4 day Hsp70 1d CD3 CD4 CD8 00012761 2020-01-28 60(F1)[A] 4 day Hsp70 1d CD3 CD4 CD8 00012761 2020-01-28 605.LMD : FL2 Log

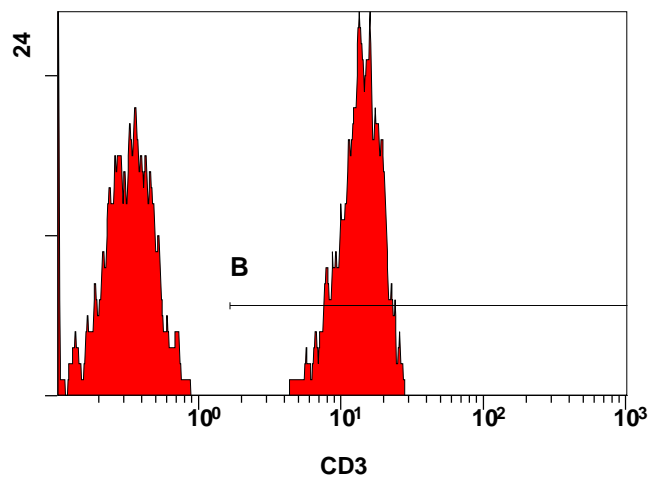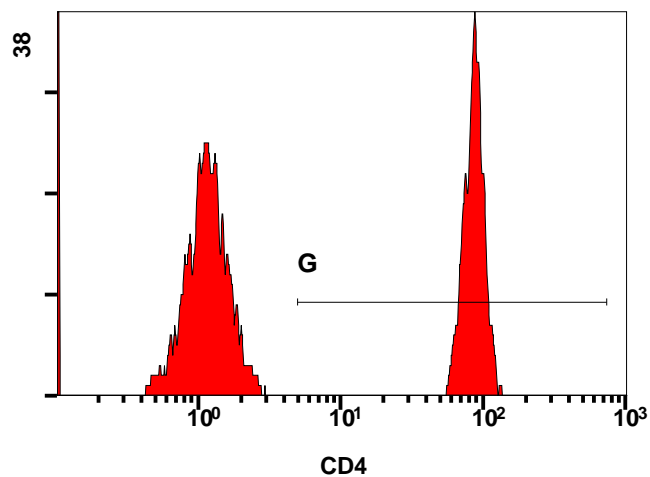

Institution: IBG

Protocol: 3P Tanya lymph 240120.PRO

Listmode Replay: New Protocol

Analysis Date: 20-Apr-2021, 20:04:35

Settings File: 3P Tanya lymph 240120.PRO, 28-Jan-2020, 15:34:51

Listmode File: 4 day Hsp70 1d CD3 CD4 CD8 00012761 2020-01-28 605.LMD

Run Date: 28-Jan-20, 15:35:08

Sample ID: 4 day Hsp70 1d

User ID: Yashin

Acquisition Time/Events: 9.3s / 10000 (PROTOCOL)

Instrument SN: AK02006 Software Version: CXP 2.2

1)[A] 4 day Hsp70 1d CD3 CD4 CD8 00012761 2020-01-28 605.LMD : FL4 Log .

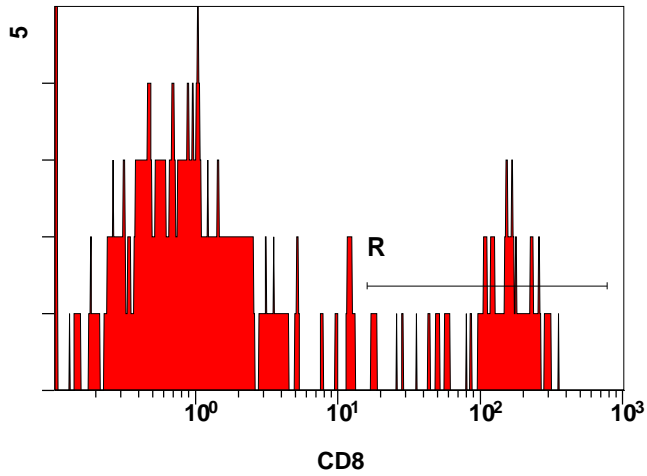

# **Statistical Analysis**

## **PROGRAM INFORMATION**

| File:- 4 day Hsp70 1d CD3 CD4 CD8 00012761 2020-01-28 605.LMD     |        |        |        |        |        |
|-------------------------------------------------------------------|--------|--------|--------|--------|--------|
| Gate:- A [A]                                                      |        |        |        |        |        |
| Compensation:- Advanced                                           |        |        |        |        |        |
| Filename:- 4 day Hsp70 1d CD3 CD4 CD8 00012761 2020-01-28 605.LMD |        |        |        |        |        |
| Mean Calculation Method:-LOG-LOG                                  |        |        |        |        |        |
| Region                                                            | Number | %Total | %Gated | X-Mean | Y-Mean |
| ALL                                                               | 4697   | 46.97  | 100.00 | 7      | 31.7   |
| ALL                                                               | 4697   | 46.97  | 100.00 | 31.7   | ###    |
| ALL                                                               | 4697   | 46.97  | 100.00 | 7      | ###    |
| ALL                                                               | 4697   | 46.97  | 100.00 | 7      | 19.5   |
| ALL                                                               | 4697   | 46.97  | 100.00 | 19.5   | ###    |
| ALL                                                               | 4697   | 46.97  | 100.00 | 31.7   | 19.5   |
| B                                                                 | 2327   | 23.27  | 49.54  | 13.8   | ###    |
| G                                                                 | 1715   | 17.15  | 36.51  | 85     | ###    |
| R                                                                 | 650    | 6.50   | 13.84  | 135    | ###    |
| U1                                                                | 26     | 0.26   | 0.55   | 1.03   | 45.3   |
| U2                                                                | 1689   | 16.89  | 35.96  | 15.2   | 85.6   |
| U3                                                                | 2343   | 23.43  | 49.88  | 0.354  | 1.17   |
| U4                                                                | 639    | 6.39   | 13.60  | 10     | 0.566  |
| W1                                                                | 242    | 2.42   | 5.15   | 0.816  | 50.6   |
| W2                                                                | 416    | 4.16   | 8.86   | 11.1   | 183    |
| W3                                                                | 2213   | 22.13  | 47.12  | 0.433  | 1.42   |
| W4                                                                | 1826   | 18.26  | 38.88  | 14.9   | 0.196  |
| X1                                                                | 747    | 7.47   | 15.90  | 0.492  | 117    |
| X2                                                                | 10     | 0.10   | 0.21   | 17.6   | 160    |
| X3                                                                | 2249   | 22.49  | 47.88  | 1.25   | 0.961  |
| X4                                                                | 1691   | 16.91  | 36.00  | 86     | 0.114  |

| File:- 4 day Hsp70 1d CD3 CD4 CD8 00012761 2020-01-28 605.LMD     |        |        |        |        |        |
|-------------------------------------------------------------------|--------|--------|--------|--------|--------|
| Gate:- Ungated                                                    |        |        |        |        |        |
| Compensation:- Advanced                                           |        |        |        |        |        |
| Filename:- 4 day Hsp70 1d CD3 CD4 CD8 00012761 2020-01-28 605.LMD |        |        |        |        |        |
| Mean Calculation Method:-LOG-LOG                                  |        |        |        |        |        |
| Region                                                            | Number | %Total | %Gated | X-Mean | Y-Mean |
| ALL                                                               | 10000  | 100.00 | 100.00 | 200    | 507    |
| A                                                                 | 4697   | 46.97  | 46.97  | 78.6   | 471    |
