# Supplementary material for: Hsp70 Interacts with the TREM-1 Receptor Expressed on Monocytes and Thereby Stimulates Generation of Cytotoxic Lymphocytes Active against MHC-Negative Tumor Cells
Source: MDPI journal article supplement (doi:10.3390/ijms22136889), 2021-06-26
Supplement: s1 [file s1]

Institution: IBG

Protocol: 3P Tanya lymph 240120.PRO

Listmode Replay: New Protocol

Analysis Date: 20-Apr-2021, 20:08:26

Settings File: 3P Tanya lymph 240120.PRO, 30-Jan-2020, 14:58:42

Listmode File: 6 day Hsp70 1 d CD16 CD56 00012774 2020-01-30 618.LMD

Run Date: 30-Jan-20, 14:58:59

Sample ID: 6 day Hsp70 1 d

User ID: Yashin

Acquisition Time/Events: 8.7s / 10000 (PROTOCOL)

Instrument SN: AK02006 Software Version: CXP 2.2

**A] 6 day Hsp70 1 d CD16 CD56 00012774 2020-01-30 618.LMD : SS Lin/**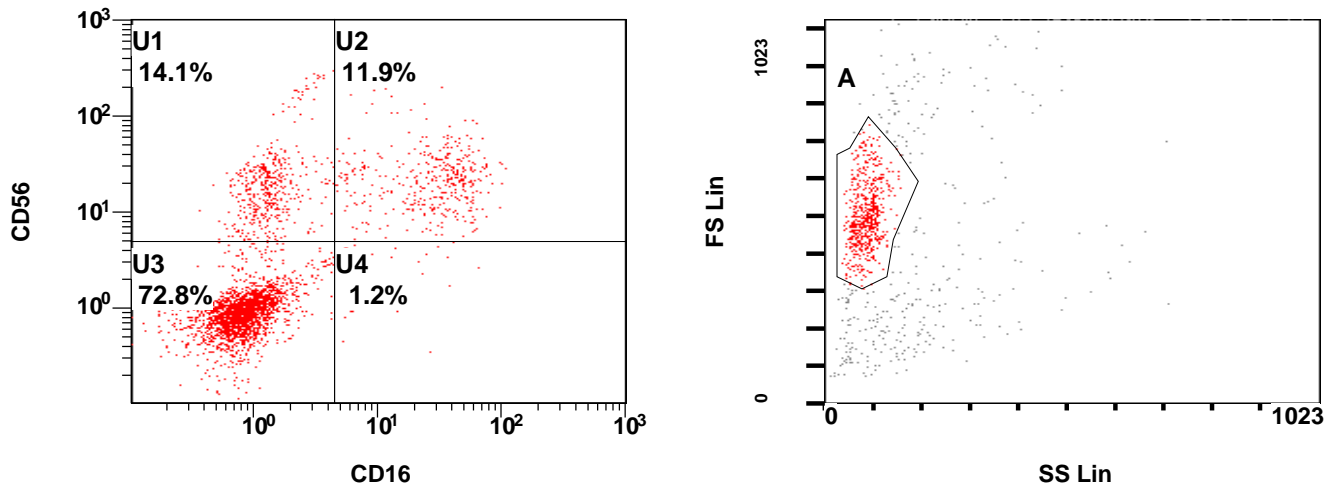**F1][A] 6 day Hsp70 1 d CD16 CD56 00012774 2020-01-30 618.LMD : FL2 Log**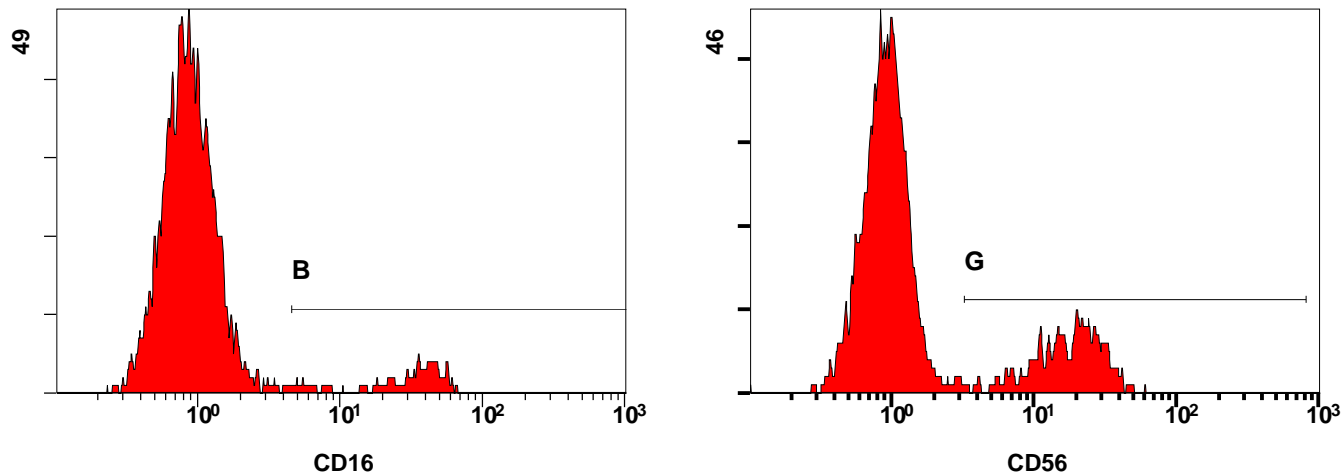

**Statistical Analysis****PROGRAM INFORMATION**

File:- 6 day Hsp70 1 d CD16 CD56 00012774 2020-01-30 618.LMD

Gate:- A [A]

Compensation:- Advanced

Filename:- 6 day Hsp70 1 d CD16 CD56 00012774 2020-01-30 618.LMD

Mean Calculation Method:-LOG-LOG

| Region | Number | %Total | %Gated | X-Mean | Y-Mean |
|--------|--------|--------|--------|--------|--------|
| ALL    | 6323   | 63.23  | 100.00 | 4.91   | 8.09   |
| ALL    | 6323   | 63.23  | 100.00 | 4.91   | ###    |
| ALL    | 6323   | 63.23  | 100.00 | 8.09   | ###    |
| B      | 828    | 8.28   | 13.10  | 31     | ###    |
| G      | 1742   | 17.42  | 27.55  | 26.8   | ###    |
| U1     | 889    | 8.89   | 14.06  | 1.48   | 27.4   |
| U2     | 754    | 7.54   | 11.92  | 32.5   | 29.1   |
| U3     | 4602   | 46.02  | 72.78  | 0.889  | 1.01   |
| U4     | 78     | 0.78   | 1.23   | 14.8   | 2.79   |

File:- 6 day Hsp70 1 d CD16 CD56 00012774 2020-01-30 618.LMD

Gate:- Ungated

Compensation:- Advanced

Filename:- 6 day Hsp70 1 d CD16 CD56 00012774 2020-01-30 618.LMD

Mean Calculation Method:-LOG-LOG

| Region | Number | %Total | %Gated | X-Mean | Y-Mean |
|--------|--------|--------|--------|--------|--------|
| ALL    | 10000  | 100.00 | 100.00 | 151    | 506    |
| A      | 6323   | 63.23  | 63.23  | 85.6   | 506    |
