# Supplementary material for: Hsp70 Interacts with the TREM-1 Receptor Expressed on Monocytes and Thereby Stimulates Generation of Cytotoxic Lymphocytes Active against MHC-Negative Tumor Cells
Source: MDPI journal article supplement (doi:10.3390/ijms22136889), 2021-06-26
Supplement: s1 [file s1]

Institution: IBG

Protocol: 3P Tanya lymph 240120.PRO

Listmode Replay: New Protocol

Analysis Date: 20-Apr-2021, 20:04:59

Settings File: 3P Tanya lymph 240120.PRO, 29-Jan-2020, 16:01:52

Listmode File: 5 day Hsp70 1d CD3 CD4 CD8 00012769 2020-01-29 613.LMD

Run Date: 29-Jan-20, 16:02:09

Sample ID: 5 day Hsp70 1d

User ID: Yashin

Acquisition Time/Events: 12.6s / 10000 (PROTOCOL)

Instrument SN: AK02006 Software Version: CXP 2.2

q 5 day Hsp70 1d CD3 CD4 CD8 00012769 2020-01-29 61;(F1)[A] 5 day Hsp70 1d CD3 CD4 CD8 00012769 2020-01-29 613.LMD : FL1 Log/FL

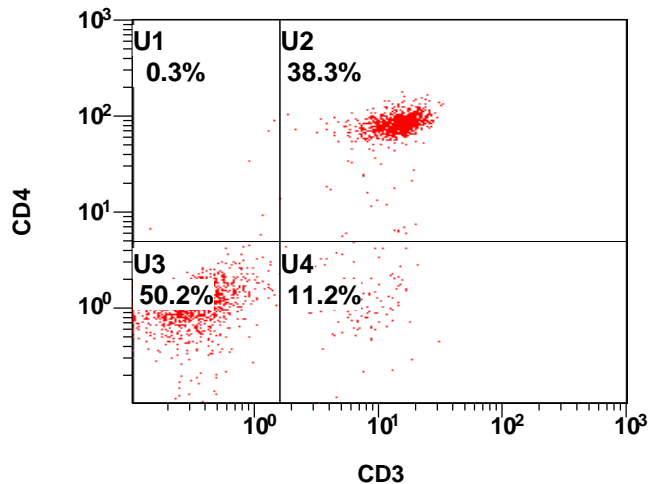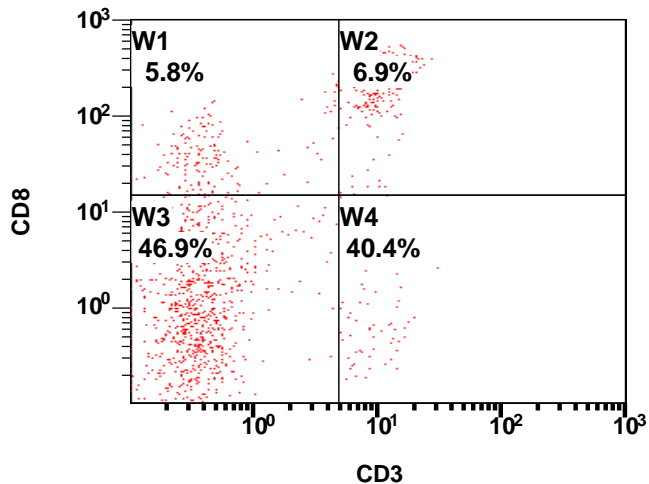

q 5 day Hsp70 1d CD3 CD4 CD8 00012769 2020-01-29 6(F1)[Ungated] 5 day Hsp70 1d CD3 CD4 CD8 00012769 2020-01-29 613.LMD : SS Lin

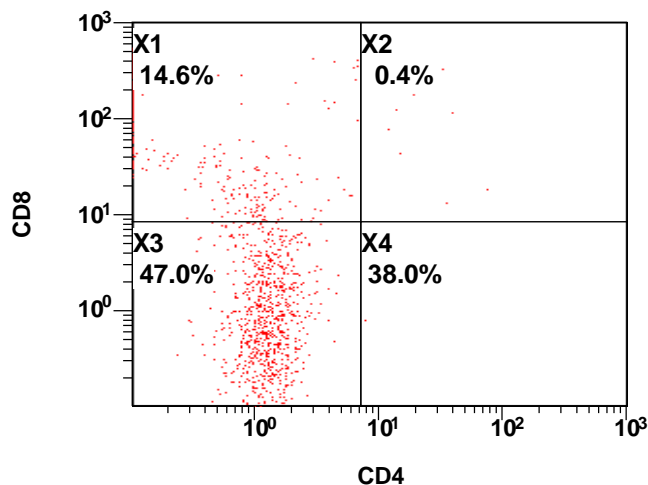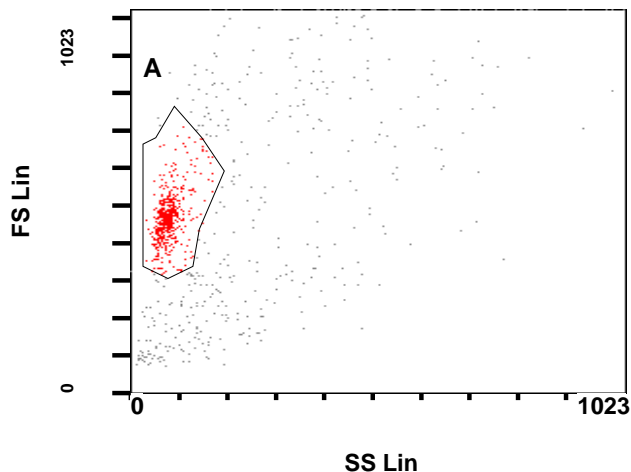

1)[A] 5 day Hsp70 1d CD3 CD4 CD8 00012769 2020-01-29 61;(F1)[A] 5 day Hsp70 1d CD3 CD4 CD8 00012769 2020-01-29 613.LMD : FL2 Log

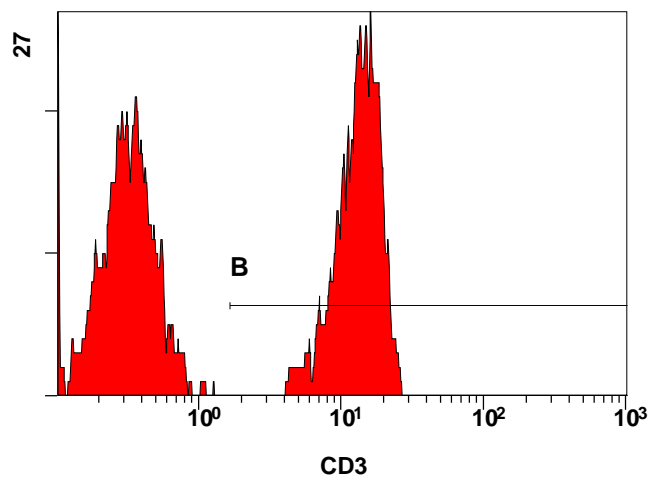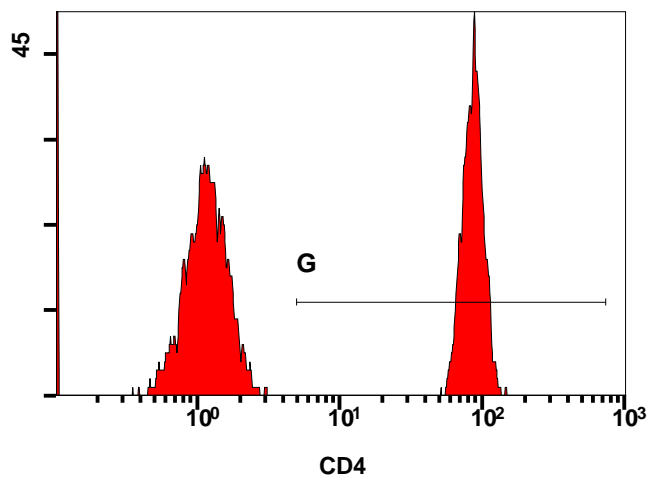

Institution: IBG

Protocol: 3P Tanya lymph 240120.PRO

Listmode Replay: New Protocol

Analysis Date: 20-Apr-2021, 20:04:59

Settings File: 3P Tanya lymph 240120.PRO, 29-Jan-2020, 16:01:52

Listmode File: 5 day Hsp70 1d CD3 CD4 CD8 00012769 2020-01-29 613.LMD

Run Date: 29-Jan-20, 16:02:09

Sample ID: 5 day Hsp70 1d

User ID: Yashin

Acquisition Time/Events: 12.6s / 10000 (PROTOCOL)

Instrument SN: AK02006 Software Version: CXP 2.2

1)[A] 5 day Hsp70 1d CD3 CD4 CD8 00012769 2020-01-29 613.LMD : FL4 Log .

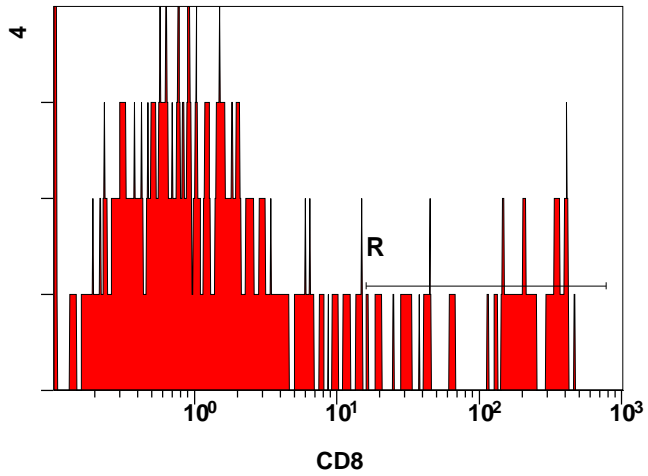

# Statistical Analysis

## PROGRAM INFORMATION

File:- 5 day Hsp70 1d CD3 CD4 CD8 00012769 2020-01-29 613.LMD

Gate:- A [A]

Compensation:- Advanced

Filename:- 5 day Hsp70 1d CD3 CD4 CD8 00012769 2020-01-29 613.LMD

Mean Calculation Method:-LOG-LOG

| Region | Number | %Total | %Gated | X-Mean | Y-Mean |
|--------|--------|--------|--------|--------|--------|
| ALL    | 5398   | 53.98  | 100.00 | 6.84   | 33.9   |
| ALL    | 5398   | 53.98  | 100.00 | 33.9   | ###    |
| ALL    | 5398   | 53.98  | 100.00 | 6.84   | ###    |
| ALL    | 5398   | 53.98  | 100.00 | 6.84   | 20.9   |
| ALL    | 5398   | 53.98  | 100.00 | 20.9   | ###    |
| ALL    | 5398   | 53.98  | 100.00 | 33.9   | 20.9   |
| B      | 2669   | 26.69  | 49.44  | 13.5   | ###    |
| G      | 2083   | 20.83  | 38.59  | 86.1   | ###    |
| R      | 676    | 6.76   | 12.52  | 161    | ###    |
| U1     | 16     | 0.16   | 0.30   | 1      | 40.6   |
| U2     | 2067   | 20.67  | 38.29  | 14.7   | 86.5   |
| U3     | 2711   | 27.11  | 50.22  | 0.352  | 1.18   |
| U4     | 604    | 6.04   | 11.19  | 9.31   | 0.657  |
| W1     | 312    | 3.12   | 5.78   | 0.823  | 55.9   |
| W2     | 375    | 3.75   | 6.95   | 11     | 244    |
| W3     | 2532   | 25.32  | 46.91  | 0.447  | 1.45   |
| W4     | 2179   | 21.79  | 40.37  | 14.4   | 0.175  |
| X1     | 788    | 7.88   | 14.60  | 0.565  | 135    |
| X2     | 19     | 0.19   | 0.35   | 22     | 213    |
| X3     | 2539   | 25.39  | 47.04  | 1.27   | 0.975  |
| X4     | 2052   | 20.52  | 38.01  | 87.2   | 0.111  |

File:- 5 day Hsp70 1d CD3 CD4 CD8 00012769 2020-01-29 613.LMD

Gate:- Ungated

Compensation:- Advanced

Filename:- 5 day Hsp70 1d CD3 CD4 CD8 00012769 2020-01-29 613.LMD

Mean Calculation Method:-LOG-LOG

| Region | Number | %Total | %Gated | X-Mean | Y-Mean |
|--------|--------|--------|--------|--------|--------|
| ALL    | 10000  | 100.00 | 100.00 | 195    | 512    |
| A      | 5398   | 53.98  | 53.98  | 78.6   | 474    |
