# Supplementary material for: Hsp70 Interacts with the TREM-1 Receptor Expressed on Monocytes and Thereby Stimulates Generation of Cytotoxic Lymphocytes Active against MHC-Negative Tumor Cells
Source: MDPI journal article supplement (doi:10.3390/ijms22136889), 2021-06-26
Supplement: s1 [file s1]

Institution: IBG

Protocol: 3P Tanya lymph 240120.PRO

Listmode Replay: New Protocol

Analysis Date: 20-Apr-2021, 20:07:59

Settings File: 3P Tanya lymph 240120.PRO, 29-Jan-2020, 15:59:19

Listmode File: 5 day Hsp701d CD16 CD56 00012768 2020-01-29 612.LMD

Run Date: 29-Jan-20, 15:59:36

Sample ID: 5 day Hsp701d

User ID: Yashin

Acquisition Time/Events: 13.7s / 10000 (PROTOCOL)

Instrument SN: AK02006 Software Version: CXP 2.2

[A] 5 day Hsp701d CD16 CD56 00012768 2020-01-29 612.(F1)[Ungated] 5 day Hsp701d CD16 CD56 00012768 2020-01-29 612.LMD : SS Lin/F

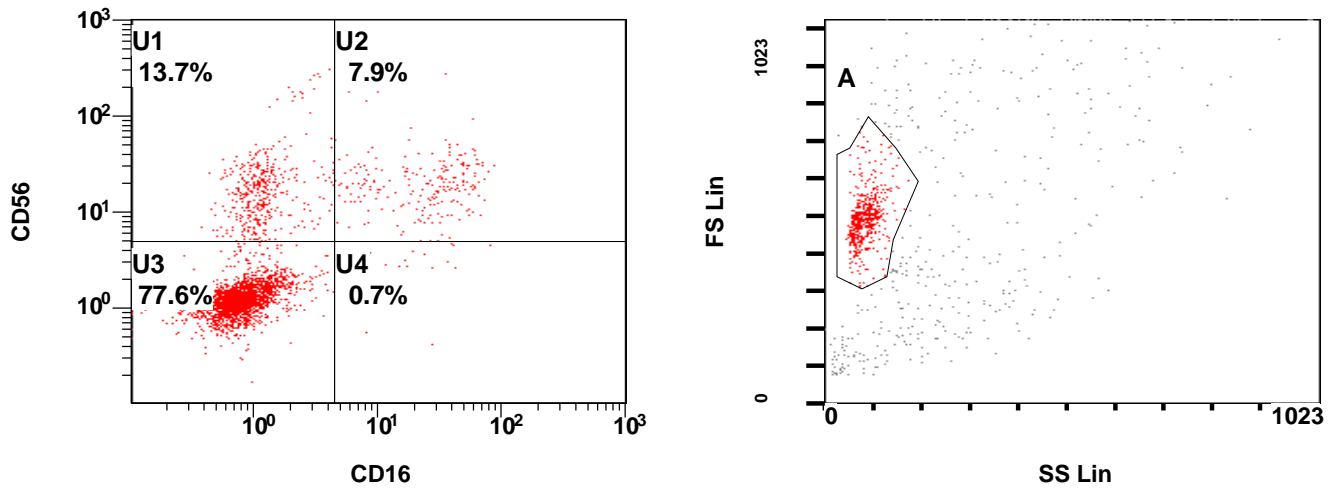

(F1)[A] 5 day Hsp701d CD16 CD56 00012768 2020-01-29 612.L(F1)[A] 5 day Hsp701d CD16 CD56 00012768 2020-01-29 612.LMD : FL2 Log ·

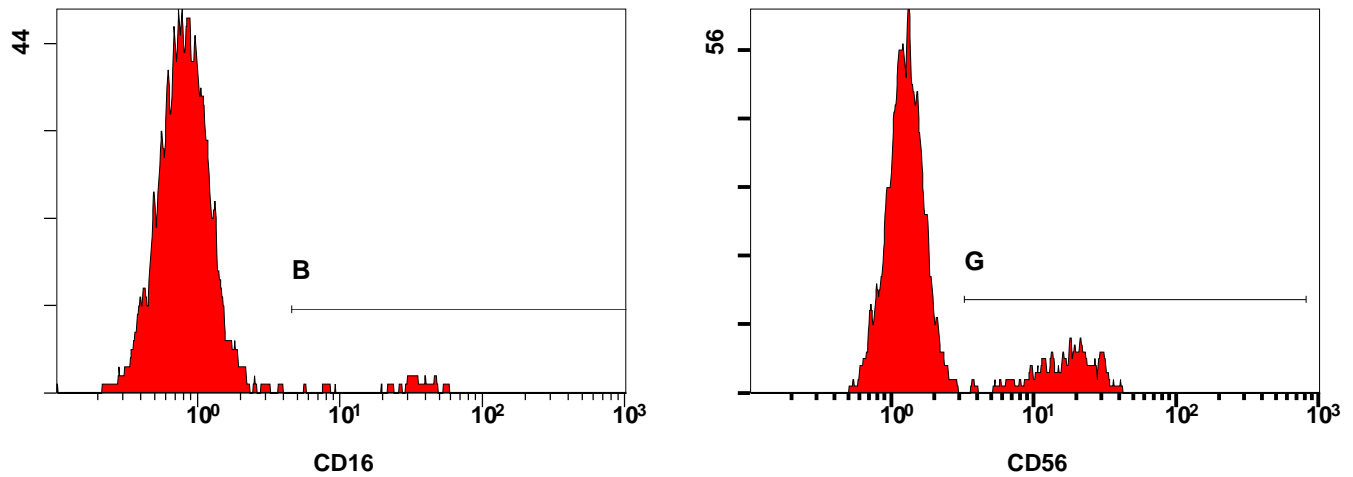

**Statistical Analysis****PROGRAM INFORMATION**

File:- 5 day Hsp701d CD16 CD56 00012768 2020-01-29 612.LMD

Gate:- A [A]

Compensation:- Advanced

Filename:- 5 day Hsp701d CD16 CD56 00012768 2020-01-29 612.LMD

Mean Calculation Method:-LOG-LOG

| Region | Number | %Total | %Gated | X-Mean | Y-Mean |
|--------|--------|--------|--------|--------|--------|
| ALL    | 5763   | 57.63  | 100.00 | 3.24   | 6.76   |
| ALL    | 5763   | 57.63  | 100.00 | 3.24   | ###    |
| ALL    | 5763   | 57.63  | 100.00 | 6.76   | ###    |
| B      | 499    | 4.99   | 8.66   | 27.9   | ###    |
| G      | 1328   | 13.28  | 23.04  | 25     | ###    |
| U1     | 789    | 7.89   | 13.69  | 1.3    | 25.2   |
| U2     | 458    | 4.58   | 7.95   | 28.6   | 28.4   |
| U3     | 4473   | 44.73  | 77.62  | 0.835  | 1.34   |
| U4     | 43     | 0.43   | 0.75   | 19     | 2.63   |

File:- 5 day Hsp701d CD16 CD56 00012768 2020-01-29 612.LMD

Gate:- Ungated

Compensation:- Advanced

Filename:- 5 day Hsp701d CD16 CD56 00012768 2020-01-29 612.LMD

Mean Calculation Method:-LOG-LOG

| Region | Number | %Total | %Gated | X-Mean | Y-Mean |
|--------|--------|--------|--------|--------|--------|
| ALL    | 10000  | 100.00 | 100.00 | 188    | 525    |
| A      | 5763   | 57.63  | 57.63  | 82.4   | 496    |
