# Supplementary material for: Hsp70 Interacts with the TREM-1 Receptor Expressed on Monocytes and Thereby Stimulates Generation of Cytotoxic Lymphocytes Active against MHC-Negative Tumor Cells
Source: MDPI journal article supplement (doi:10.3390/ijms22136889), 2021-06-26
Supplement: s1 [file s1]

Institution: IBG

Protocol: 3P Tanya lymph 240120.PRO

Listmode Replay: New Protocol

Analysis Date: 20-Apr-2021, 20:05:19

Settings File: 3P Tanya lymph 240120.PRO, 30-Jan-2020, 15:00:21

Listmode File: 6 day Hsp70 1d CD3 CD4 CD8 00012775 2020-01-30 619.LMD

Run Date: 30-Jan-20, 15:00:38

Sample ID: 6 day Hsp70 1d

User ID: Yashin

Acquisition Time/Events: 12.2s / 10000 (PROTOCOL)

Instrument SN: AK02006 Software Version: CXP 2.2

6 day Hsp70 1d CD3 CD4 CD8 00012775 2020-01-30 61(F1)[A] 6 day Hsp70 1d CD3 CD4 CD8 00012775 2020-01-30 619.LMD : FL1 Log/FL

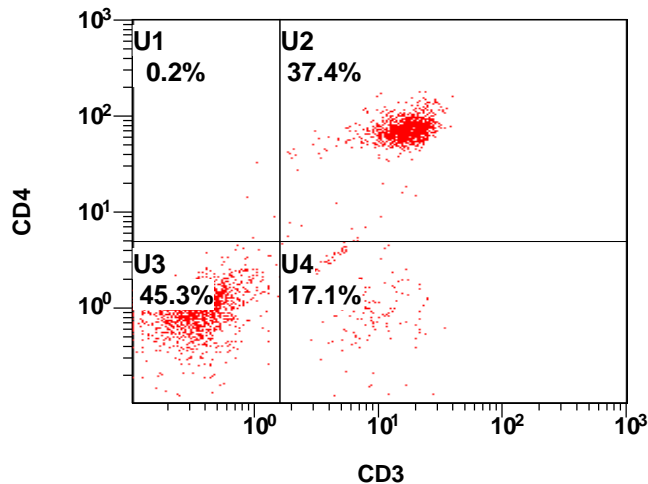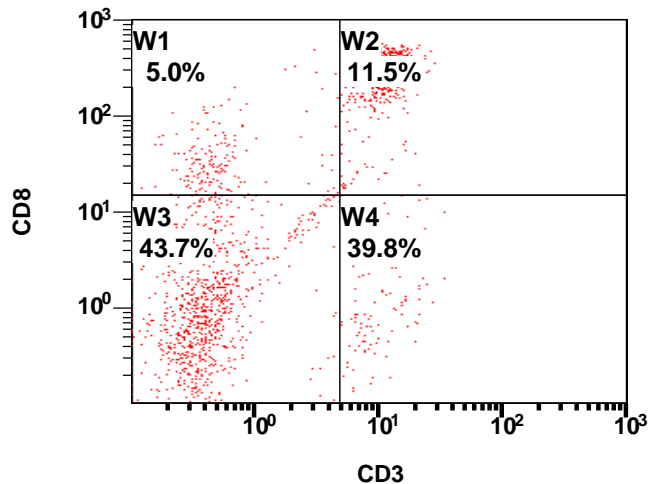

6 day Hsp70 1d CD3 CD4 CD8 00012775 2020-01-30 6(F1)[Ungated] 6 day Hsp70 1d CD3 CD4 CD8 00012775 2020-01-30 619.LMD : SS Lin

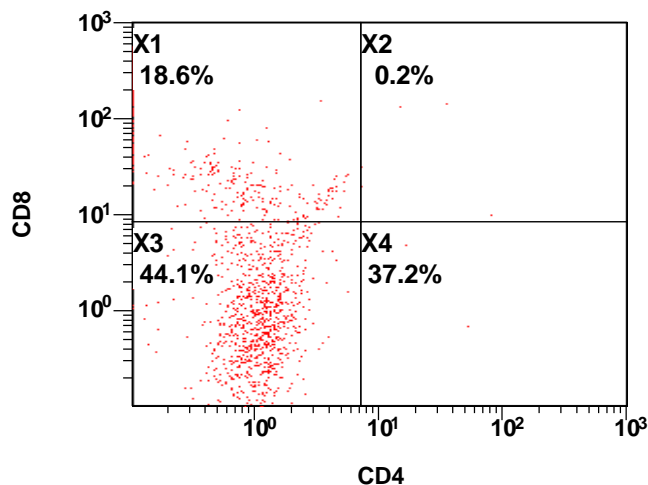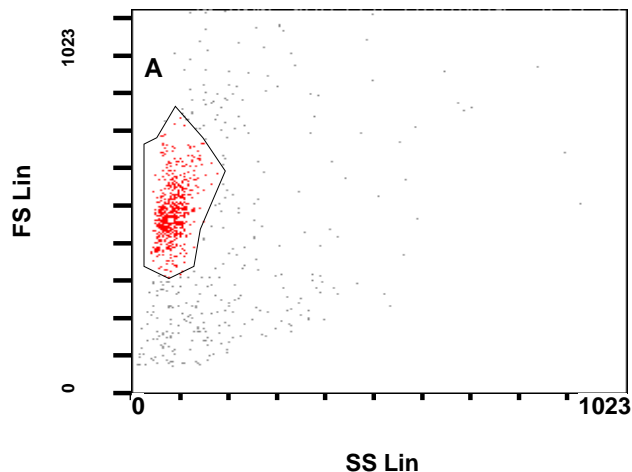

61(F1)[A] 6 day Hsp70 1d CD3 CD4 CD8 00012775 2020-01-30 61(F1)[A] 6 day Hsp70 1d CD3 CD4 CD8 00012775 2020-01-30 619.LMD : FL2 Log

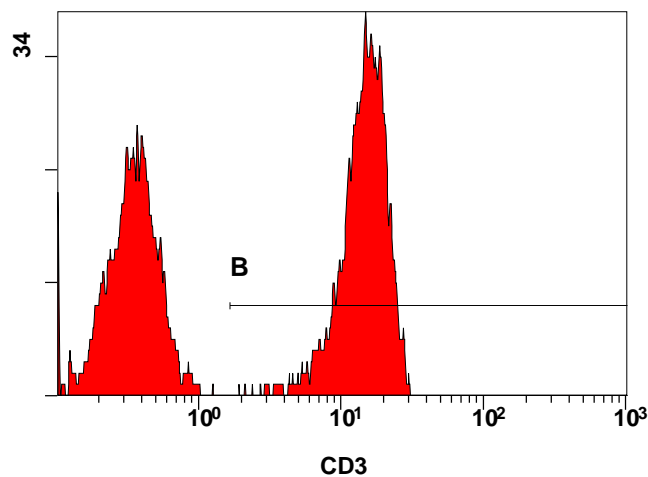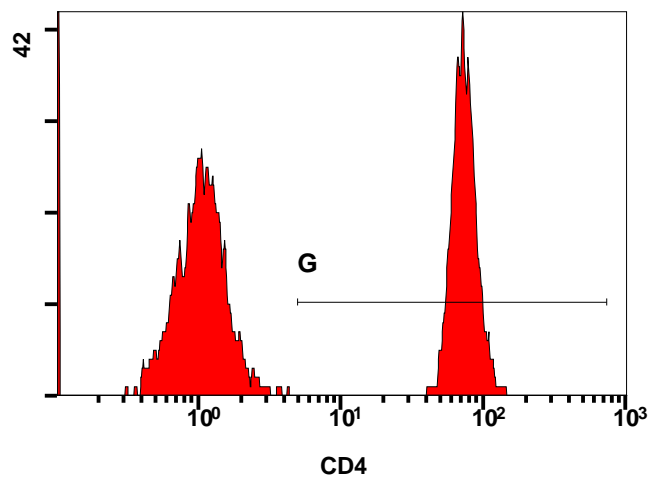

Institution: IBG

Protocol: 3P Tanya lymph 240120.PRO

Listmode Replay: New Protocol

Analysis Date: 20-Apr-2021, 20:05:19

Settings File: 3P Tanya lymph 240120.PRO, 30-Jan-2020, 15:00:21

Listmode File: 6 day Hsp70 1d CD3 CD4 CD8 00012775 2020-01-30 619.LMD

Run Date: 30-Jan-20, 15:00:38

Sample ID: 6 day Hsp70 1d

User ID: Yashin

Acquisition Time/Events: 12.2s / 10000 (PROTOCOL)

Instrument SN: AK02006 Software Version: CXP 2.2

1)[A] 6 day Hsp70 1d CD3 CD4 CD8 00012775 2020-01-30 619.LMD : FL4 Log .

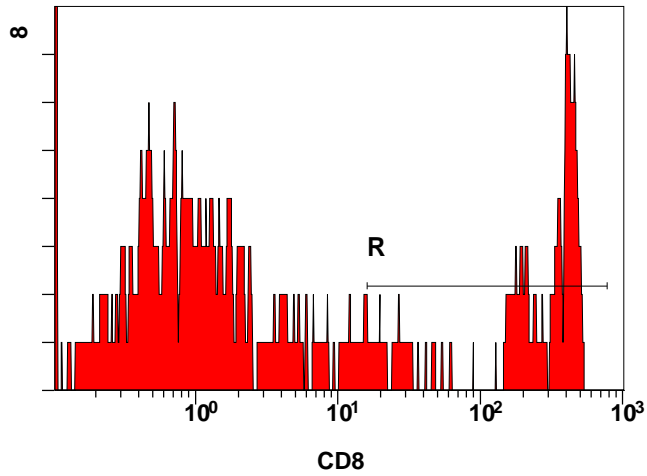

**Statistical Analysis****PROGRAM INFORMATION**

File:- 6 day Hsp70 1d CD3 CD4 CD8 00012775 2020-01-30 619.LMD

Gate:- A [A]

Compensation:- Advanced

Filename:- 6 day Hsp70 1d CD3 CD4 CD8 00012775 2020-01-30 619.LMD

Mean Calculation Method:-LOG-LOG

| Region | Number | %Total | %Gated | X-Mean | Y-Mean |
|--------|--------|--------|--------|--------|--------|
| ALL    | 6209   | 62.09  | 100.00 | 8.13   | 28.8   |
| ALL    | 6209   | 62.09  | 100.00 | 28.8   | ###    |
| ALL    | 6209   | 62.09  | 100.00 | 8.13   | ###    |
| ALL    | 6209   | 62.09  | 100.00 | 8.13   | 37.6   |
| ALL    | 6209   | 62.09  | 100.00 | 37.6   | ###    |
| ALL    | 6209   | 62.09  | 100.00 | 28.8   | 37.6   |
| B      | 3381   | 33.81  | 54.45  | 14.6   | ###    |
| G      | 2336   | 23.36  | 37.62  | 75     | ###    |
| R      | 1005   | 10.05  | 16.19  | 227    | ###    |
| U1     | 13     | 0.13   | 0.21   | 1.16   | 23.2   |
| U2     | 2324   | 23.24  | 37.43  | 16.5   | 75.2   |
| U3     | 2812   | 28.12  | 45.29  | 0.383  | 1.06   |
| U4     | 1060   | 10.60  | 17.07  | 10.5   | 0.642  |
| W1     | 308    | 3.08   | 4.96   | 0.849  | 52.9   |
| W2     | 716    | 7.16   | 11.53  | 11.9   | 296    |
| W3     | 2716   | 27.16  | 43.74  | 0.539  | 1.51   |
| W4     | 2469   | 24.69  | 39.76  | 16.3   | 0.266  |
| X1     | 1157   | 11.57  | 18.63  | 0.576  | 198    |
| X2     | 12     | 0.12   | 0.19   | 23.2   | 134    |
| X3     | 2737   | 27.37  | 44.08  | 1.14   | 1.04   |
| X4     | 2308   | 23.08  | 37.17  | 75.7   | 0.124  |

File:- 6 day Hsp70 1d CD3 CD4 CD8 00012775 2020-01-30 619.LMD

Gate:- Ungated

Compensation:- Advanced

Filename:- 6 day Hsp70 1d CD3 CD4 CD8 00012775 2020-01-30 619.LMD

Mean Calculation Method:-LOG-LOG

| Region | Number | %Total | %Gated | X-Mean | Y-Mean |
|--------|--------|--------|--------|--------|--------|
| ALL    | 10000  | 100.00 | 100.00 | 160    | 497    |
| A      | 6209   | 62.09  | 62.09  | 84.8   | 493    |
