# Supplementary material for: Hsp70 Interacts with the TREM-1 Receptor Expressed on Monocytes and Thereby Stimulates Generation of Cytotoxic Lymphocytes Active against MHC-Negative Tumor Cells
Source: MDPI journal article supplement (doi:10.3390/ijms22136889), 2021-06-26
Supplement: s1 [file s1]

Institution: IBG

Protocol: 3P Tanya lymph 240120.PRO

Listmode Replay: New Protocol

Analysis Date: 20-Apr-2021, 19:58:36

Settings File: 3P Tanya lymph 240120.PRO, 24-Jan-2020, 19:38:03

Listmode File: 0day 1 donor1 CD3CD4CD8 00012752 2020-01-24 596.LMD

Run Date: 24-Jan-20, 19:38:21

Sample ID: 0day 1 donor1

User ID: Yashin

Acquisition Time/Events: 6.5s / 10000 (PROTOCOL)

Instrument SN: AK02006 Software Version: CXP 2.2

A] 0day 1 donor1 CD3CD4CD8 00012752 2020-01-24 596.L(F1)[A] 0day 1 donor1 CD3CD4CD8 00012752 2020-01-24 596.LMD : FL1 Log/FL4

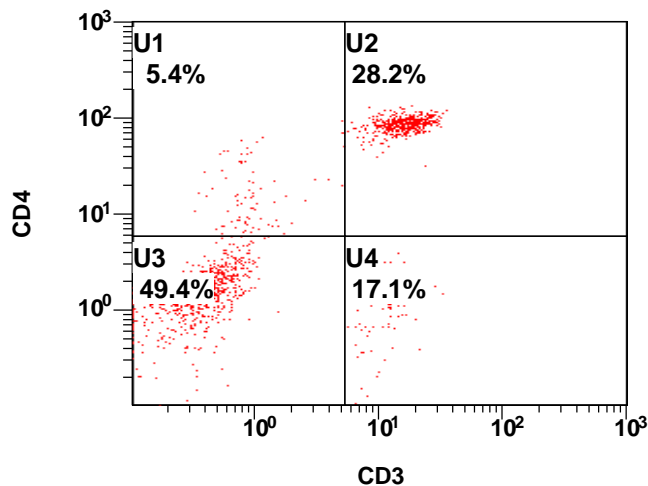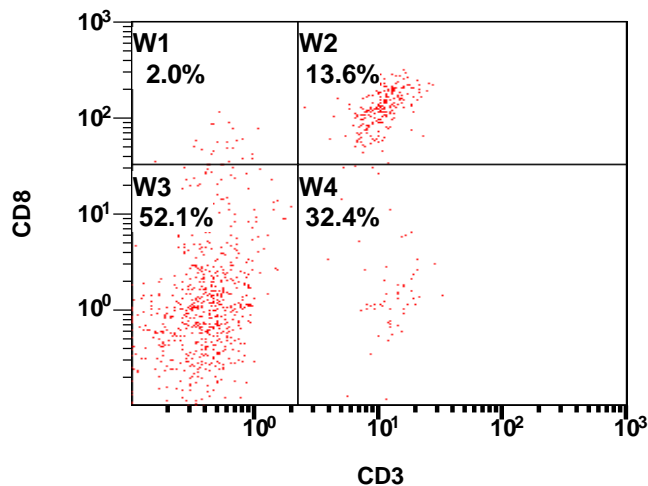

A] 0day 1 donor1 CD3CD4CD8 00012752 2020-01-24 596(F1)[Ungated] 0day 1 donor1 CD3CD4CD8 00012752 2020-01-24 596.LMD : SS Lin/

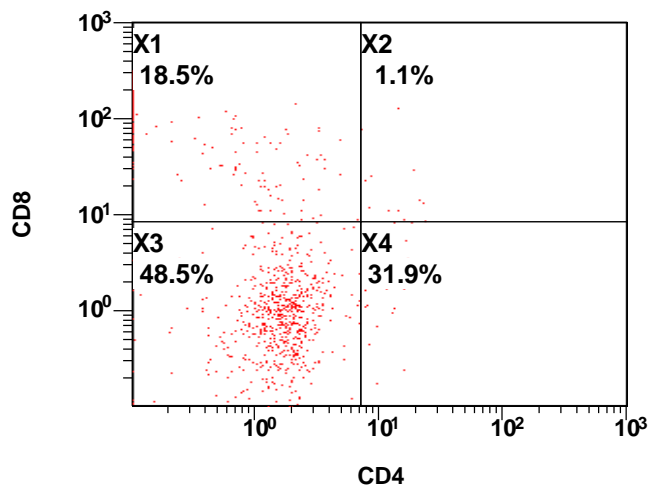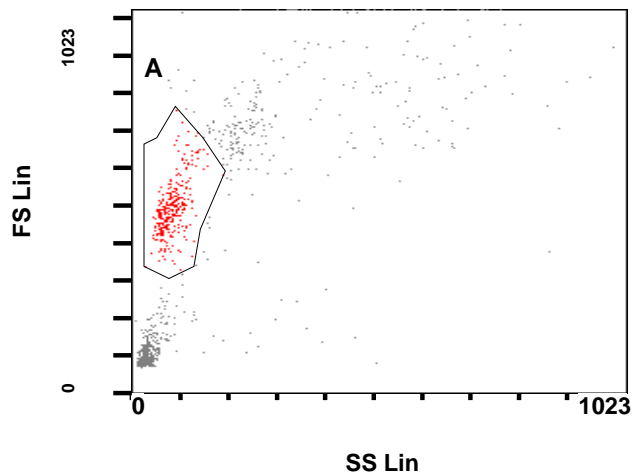

[F1][A] 0day 1 donor1 CD3CD4CD8 00012752 2020-01-24 596.L(F1)[A] 0day 1 donor1 CD3CD4CD8 00012752 2020-01-24 596.LMD : FL2 Log

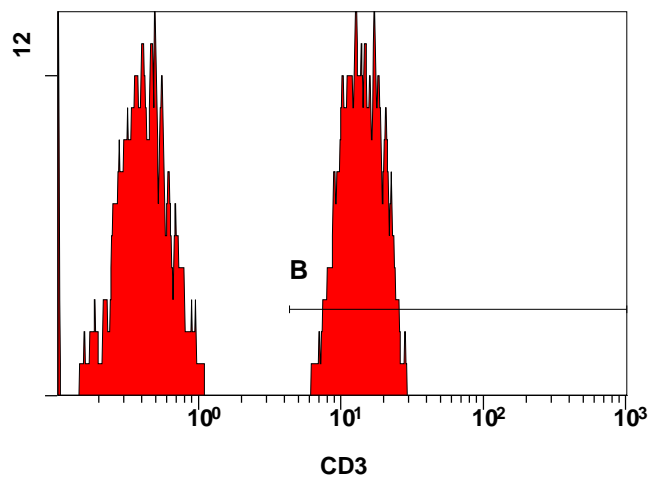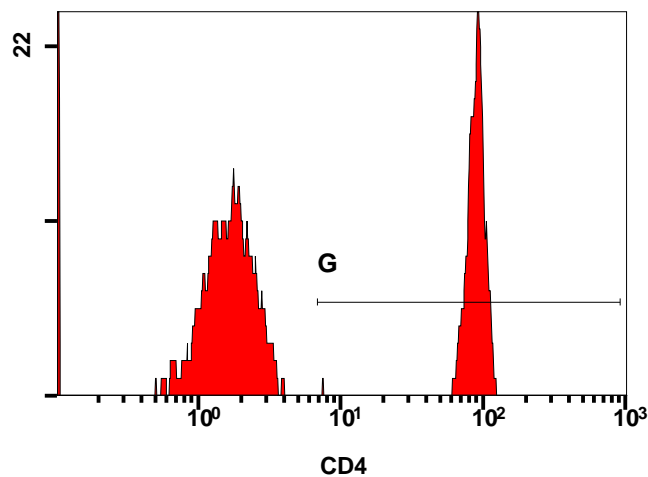

Institution: IBG

Protocol: 3P Tanya lymph 240120.PRO

Listmode Replay: New Protocol

Analysis Date: 20-Apr-2021, 19:58:37

Settings File: 3P Tanya lymph 240120.PRO, 24-Jan-2020, 19:38:03

Listmode File: 0day 1 donor1 CD3CD4CD8 00012752 2020-01-24 596.LMD

Run Date: 24-Jan-20, 19:38:21

Sample ID: 0day 1 donor1

User ID: Yashin

Acquisition Time/Events: 6.5s / 10000 (PROTOCOL)

Instrument SN: AK02006 Software Version: CXP 2.2

[F1][A] 0day 1 donor1 CD3CD4CD8 00012752 2020-01-24 596.LMD : FL4 Log .

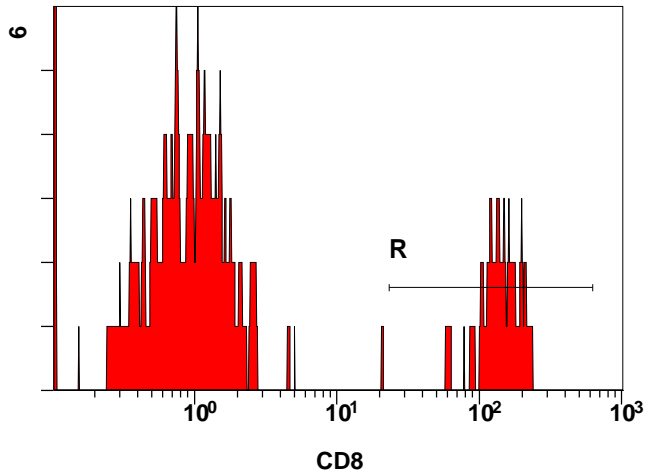

# Statistical Analysis

## PROGRAM INFORMATION

| File:- 0day 1 donor1 CD3CD4CD8 00012752 2020-01-24 596.LMD     |        |        |        |        |        |
|----------------------------------------------------------------|--------|--------|--------|--------|--------|
| Gate:- A [A]                                                   |        |        |        |        |        |
| Compensation:- Advanced                                        |        |        |        |        |        |
| Filename:- 0day 1 donor1 CD3CD4CD8 00012752 2020-01-24 596.LMD |        |        |        |        |        |
| Mean Calculation Method:-LOG-LOG                               |        |        |        |        |        |
| Region                                                         | Number | %Total | %Gated | X-Mean | Y-Mean |
| ALL                                                            | 3164   | 31.64  | 100.00 | 6.95   | 27.2   |
| ALL                                                            | 3164   | 31.64  | 100.00 | 27.2   | 22.1   |
| ALL                                                            | 3164   | 31.64  | 100.00 | 6.95   | 22.1   |
| ALL                                                            | 3164   | 31.64  | 100.00 | 22.1   | ###    |
| ALL                                                            | 3164   | 31.64  | 100.00 | 27.2   | ###    |
| ALL                                                            | 3164   | 31.64  | 100.00 | 6.95   | ###    |
| B                                                              | 1443   | 14.43  | 45.61  | 14.7   | ###    |
| G                                                              | 1049   | 10.49  | 33.15  | 79.3   | ###    |
| R                                                              | 524    | 5.24   | 16.56  | 127    | ###    |
| U1                                                             | 170    | 1.70   | 5.37   | 1.16   | 21.9   |
| U2                                                             | 891    | 8.91   | 28.16  | 16.4   | 89.2   |
| U3                                                             | 1563   | 15.63  | 49.40  | 0.43   | 1.73   |
| U4                                                             | 540    | 5.40   | 17.07  | 12     | 0.487  |
| W1                                                             | 62     | 0.62   | 1.96   | 0.692  | 58.8   |
| W2                                                             | 430    | 4.30   | 13.59  | 11.4   | 145    |
| W3                                                             | 1647   | 16.47  | 52.05  | 0.442  | 2.13   |
| W4                                                             | 1025   | 10.25  | 32.40  | 15.9   | 0.602  |
| X1                                                             | 585    | 5.85   | 18.49  | 0.583  | 114    |
| X2                                                             | 36     | 0.36   | 1.14   | 18.2   | 33.7   |
| X3                                                             | 1536   | 15.36  | 48.55  | 1.78   | 1.09   |
| X4                                                             | 1009   | 10.09  | 31.89  | 81.7   | 0.192  |

| File:- 0day 1 donor1 CD3CD4CD8 00012752 2020-01-24 596.LMD     |        |        |        |        |        |
|----------------------------------------------------------------|--------|--------|--------|--------|--------|
| Gate:- Ungated                                                 |        |        |        |        |        |
| Compensation:- Advanced                                        |        |        |        |        |        |
| Filename:- 0day 1 donor1 CD3CD4CD8 00012752 2020-01-24 596.LMD |        |        |        |        |        |
| Mean Calculation Method:-LOG-LOG                               |        |        |        |        |        |
| Region                                                         | Number | %Total | %Gated | X-Mean | Y-Mean |
| ALL                                                            | 10000  | 100.00 | 100.00 | 146    | 419    |
| A                                                              | 3164   | 31.64  | 31.64  | 85.5   | 503    |
