# Supplementary material for: Hsp70 Interacts with the TREM-1 Receptor Expressed on Monocytes and Thereby Stimulates Generation of Cytotoxic Lymphocytes Active against MHC-Negative Tumor Cells
Source: MDPI journal article supplement (doi:10.3390/ijms22136889), 2021-06-26
Supplement: s1 [file s1]

Institution: IBG

Protocol: 3P Tanya lymph 240120.PRO

Listmode Replay: New Protocol

Analysis Date: 26-Apr-2021, 16:42:15

Settings File: 3P Tanya lymph 240120.PRO, 27-Jan-2020, 17:20:32

Listmode File: 3 day Hsp70-1d CD16 CD56 00012754 2020-01-27 598.LMD

Run Date: 27-Jan-20, 17:20:49

Sample ID: 3 day Hsp70-1d

User ID: Yashin

Acquisition Time/Events: 9.9s / 10000 (PROTOCOL)

Instrument SN: AK02006 Software Version: CXP 2.2

**A] 3 day Hsp70-1d CD16 CD56 00012754 2020-01-27 598(F1)[Ungated] 3 day Hsp70-1d CD16 CD56 00012754 2020-01-27 598.LMD : SS Lin/**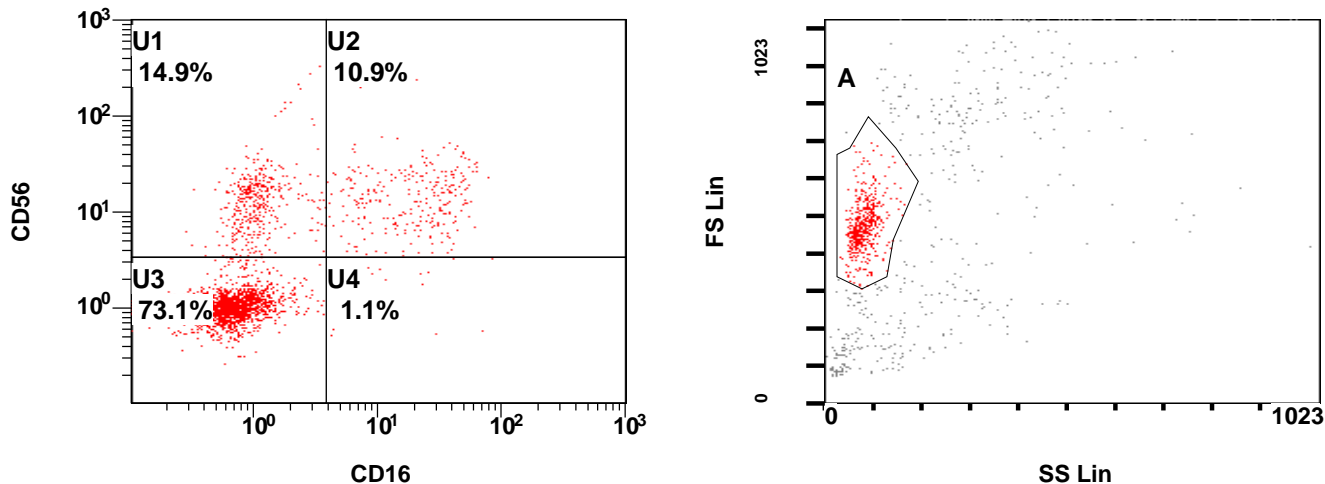**[F1][A] 3 day Hsp70-1d CD16 CD56 00012754 2020-01-27 598.L(F1)[A] 3 day Hsp70-1d CD16 CD56 00012754 2020-01-27 598.LMD : FL2 Log**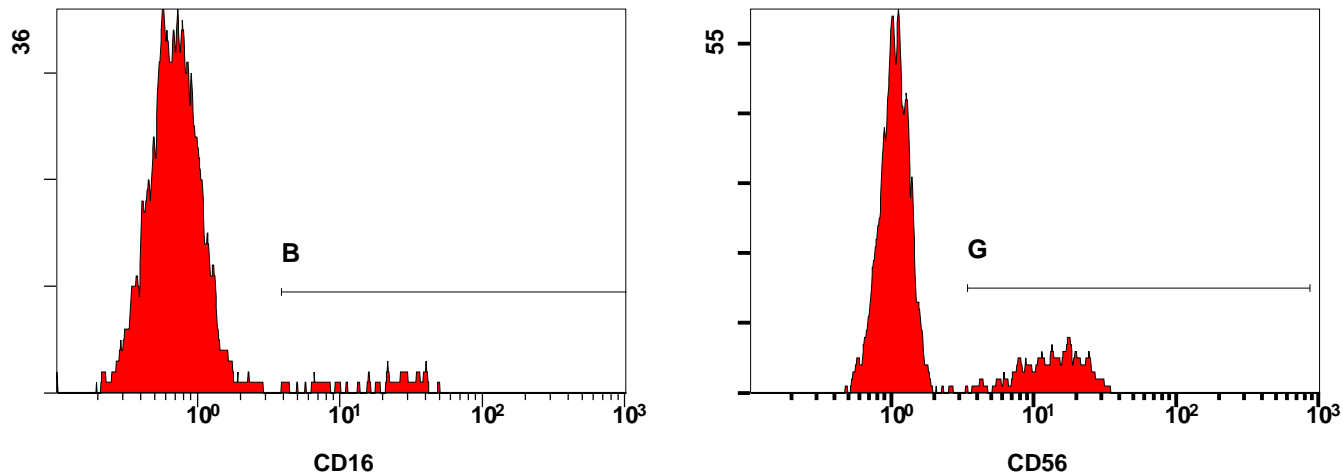

**Statistical Analysis****PROGRAM INFORMATION**

File:- 3 day Hsp70-1d CD16 CD56 00012754 2020-01-27 598.LMD

Gate:- A [A]

Compensation:- Advanced

Filename:- 3 day Hsp70-1d CD16 CD56 00012754 2020-01-27 598.LMD

Mean Calculation Method:-LOG-LOG

| Region | Number | %Total | %Gated | X-Mean | Y-Mean |
|--------|--------|--------|--------|--------|--------|
| ALL    | 5089   | 50.89  | 100.00 | 3.37   | 6.07   |
| ALL    | 5089   | 50.89  | 100.00 | 6.07   | ###    |
| ALL    | 5089   | 50.89  | 100.00 | 3.37   | ###    |
| B      | 610    | 6.10   | 11.99  | 22.3   | ###    |
| G      | 1311   | 13.11  | 25.76  | 20.4   | ###    |
| U1     | 759    | 7.59   | 14.91  | 1.16   | 20.2   |
| U2     | 556    | 5.56   | 10.93  | 23     | 20.5   |
| U3     | 3720   | 37.20  | 73.10  | 0.71   | 1.1    |
| U4     | 54     | 0.54   | 1.06   | 15.4   | 1.54   |

File:- 3 day Hsp70-1d CD16 CD56 00012754 2020-01-27 598.LMD

Gate:- Ungated

Compensation:- Advanced

Filename:- 3 day Hsp70-1d CD16 CD56 00012754 2020-01-27 598.LMD

Mean Calculation Method:-LOG-LOG

| Region | Number | %Total | %Gated | X-Mean | Y-Mean |
|--------|--------|--------|--------|--------|--------|
| ALL    | 10000  | 100.00 | 100.00 | 193    | 519    |
| A      | 5089   | 50.89  | 50.89  | 81.2   | 483    |
