# Supplementary material for: Hsp70 Interacts with the TREM-1 Receptor Expressed on Monocytes and Thereby Stimulates Generation of Cytotoxic Lymphocytes Active against MHC-Negative Tumor Cells
Source: MDPI journal article supplement (doi:10.3390/ijms22136889), 2021-06-26
Supplement: s1 [file s1]

Institution: IBG

Protocol: 3P Tanya lymph 240120.PRO

Listmode Replay: New Protocol

Analysis Date: 20-Apr-2021, 20:07:26

Settings File: 3P Tanya lymph 240120.PRO, 28-Jan-2020, 15:31:52

Listmode File: 4 day Hsp70 1d CD16 CD56 00012760 2020-01-28 604.LMD

Run Date: 28-Jan-20, 15:32:09

Sample ID: 4 day Hsp70 1d

User ID: Yashin

Acquisition Time/Events: 10.5s / 10000 (PROTOCOL)

Instrument SN: AK02006 Software Version: CXP 2.2

**A] 4 day Hsp70 1d CD16 CD56 00012760 2020-01-28 604(F1)[Ungated] 4 day Hsp70 1d CD16 CD56 00012760 2020-01-28 604.LMD : SS Lin/i**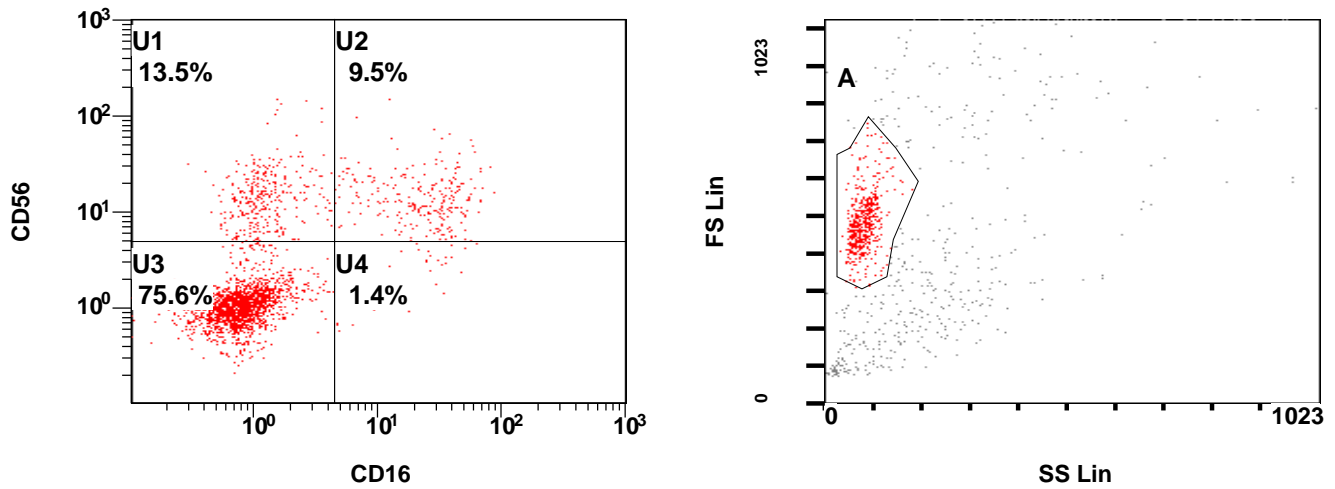**[F1][A] 4 day Hsp70 1d CD16 CD56 00012760 2020-01-28 604.L(F1)[A] 4 day Hsp70 1d CD16 CD56 00012760 2020-01-28 604.LMD : FL2 Log**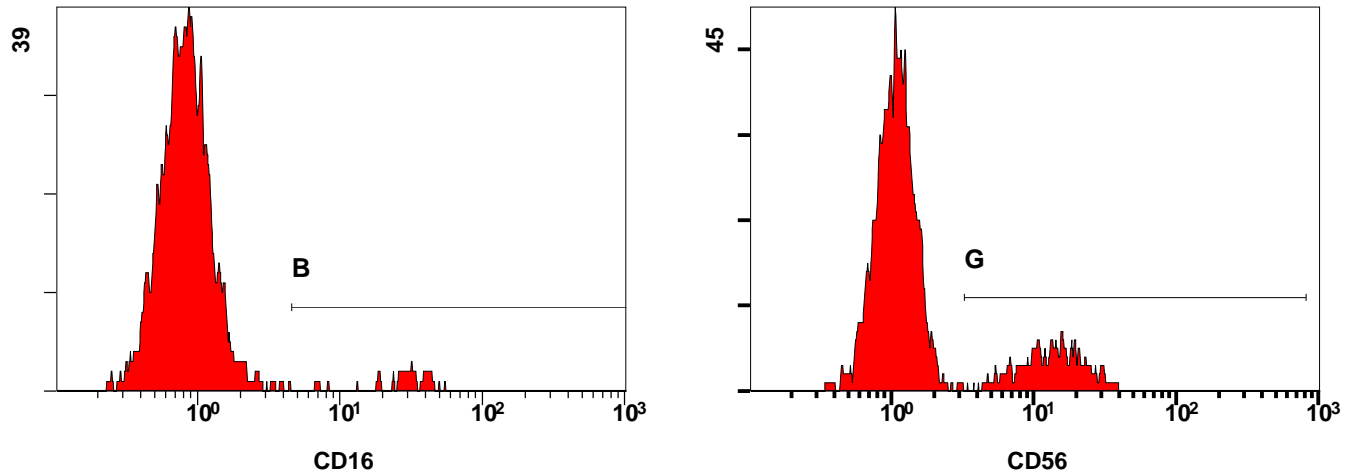

**Statistical Analysis****PROGRAM INFORMATION**

File:- 4 day Hsp70 1d CD16 CD56 00012760 2020-01-28 604.LMD

Gate:- A [A]

Compensation:- Advanced

Filename:- 4 day Hsp70 1d CD16 CD56 00012760 2020-01-28 604.LMD

Mean Calculation Method:-LOG-LOG

| Region | Number | %Total | %Gated | X-Mean | Y-Mean |
|--------|--------|--------|--------|--------|--------|
| ALL    | 5014   | 50.14  | 100.00 | 3.69   | 5.47   |
| ALL    | 5014   | 50.14  | 100.00 | 3.69   | ###    |
| ALL    | 5014   | 50.14  | 100.00 | 5.47   | ###    |
| B      | 542    | 5.42   | 10.81  | 26.3   | ###    |
| G      | 1240   | 12.40  | 24.73  | 18.7   | ###    |
| U1     | 678    | 6.78   | 13.52  | 1.39   | 19.5   |
| U2     | 474    | 4.74   | 9.45   | 27.2   | 20.2   |
| U3     | 3793   | 37.93  | 75.65  | 0.857  | 1.17   |
| U4     | 69     | 0.69   | 1.38   | 20.3   | 2.41   |

File:- 4 day Hsp70 1d CD16 CD56 00012760 2020-01-28 604.LMD

Gate:- Ungated

Compensation:- Advanced

Filename:- 4 day Hsp70 1d CD16 CD56 00012760 2020-01-28 604.LMD

Mean Calculation Method:-LOG-LOG

| Region | Number | %Total | %Gated | X-Mean | Y-Mean |
|--------|--------|--------|--------|--------|--------|
| ALL    | 10000  | 100.00 | 100.00 | 196    | 496    |
| A      | 5014   | 50.14  | 50.14  | 79.1   | 481    |
